# Supplementary material
Source: Springer Nature journal article supplement (https://www.springermedizin.de/resource/supplementary/12882_2014_892_MOESM1_ESM.pdf/9454524)

Systolic pressure (P1)

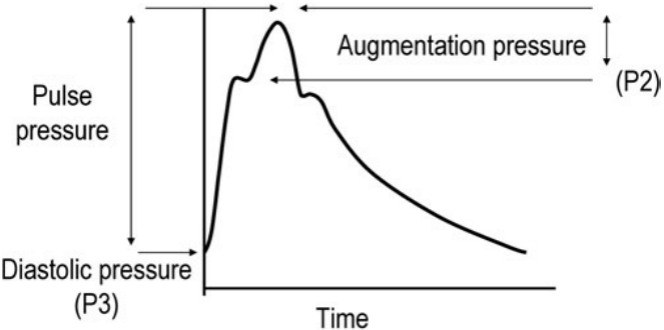

Pulse pressure

Augmentation pressure

(P2)

Diastolic pressure  
(P3)

Time

Supplement: MOESM1 [file 9454524]
